# Supplementary material for: Multiple linear combination (MLC) regression tests for common variants adapted to linkage disequilibrium structure
Source: PubMed Central journal article supplement — Genet Epidemiol. 2016 Nov 25;41(2):108–21. doi: 10.1002/gepi.22024 (PMC5245123; doi:10.1002/gepi.22024), 2016-11-25

Figure S4. Power differentials (a) between MLC and MinP-M, and (b) between MLC and PC80, each plotted against power differentials between MLC and SSBw. The latter is on the x axis. Each point corresponds to one gene with power estimated in 1000 replicated datasets (nominal  $\alpha=0.05$ ). Data were generated under simulation models 1-5, as defined in Table 2, and were analysed with (typed) and without (untyped) the causal variant(s) in the regression model.

In the upper panels: MLC power is greater than MinP-M power for genes above the x axis, MLC power is greater than SSBw power for genes on the right of the y axis, and the upper right quadrant includes all genes for which MLC is more powerful than both MinP-M and SSBw. Genes close to the diagonal line have MinP-M power  $\approx$  SSBw power, while those below the line have MinP-M power  $>$  SSBw power.

In the lower panels: MLC power is greater than PC80 power for genes above the x axis, MLC power is greater than SSBw power for genes on the right of the y axis, and the upper right quadrant includes all genes for which MLC is more powerful than both PC80 and SSBw. Genes close to the diagonal line have PC80 power  $\approx$  SSBw power, while those below the line have PC80 power  $>$  SSBw power.

The table summarizes the number of genes according to power inequalities among the methods.

| Model | # of genes | Analysis | Power Differential |          |          |             |           |
|-------|------------|----------|--------------------|----------|----------|-------------|-----------|
|       |            |          | MLC>MinPM          | MLC>SSBw | MLC>PC80 | MLC>Min,SSB | MLC>all 3 |
| 1     | 1000       | Typed    | 80                 | 369      | 260      | 53          | 32        |
|       |            | Untyped  | 258                | 348      | 349      | 193         | 132       |
| 2     | 993        | Typed    | 62                 | 51       | 142      | 27          | 9         |
|       |            | Untyped  | 223                | 279      | 249      | 170         | 97        |
| 3     | 935        | Typed    | 372                | 295      | 278      | 220         | 136       |
|       |            | Untyped  | 312                | 275      | 296      | 199         | 109       |
| 4     | 993        | Typed    | 119                | 167      | 269      | 89          | 54        |
|       |            | Untyped  | 286                | 354      | 344      | 236         | 157       |
| 5     | 935        | Typed    | 359                | 315      | 244      | 234         | 130       |
|       |            | Untyped  | 313                | 302      | 267      | 220         | 108       |

(a) Model 1: MLC-minP vs MLC-SSBw (typed)

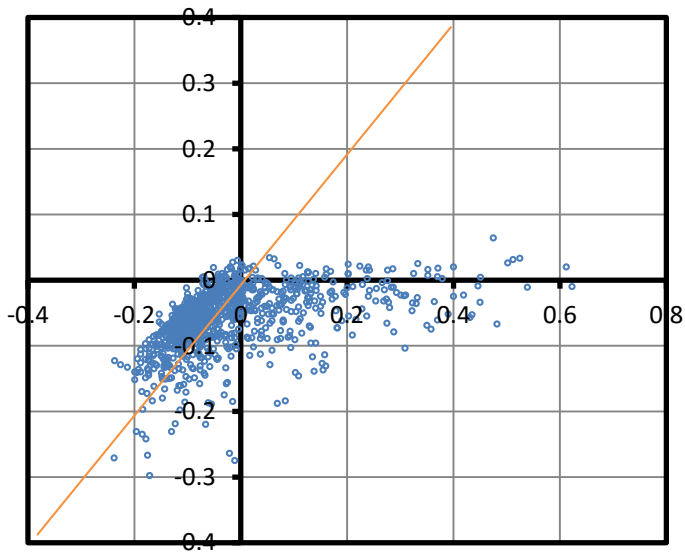

Model 1: MLC-minP vs MLC-SSBw (untyped)

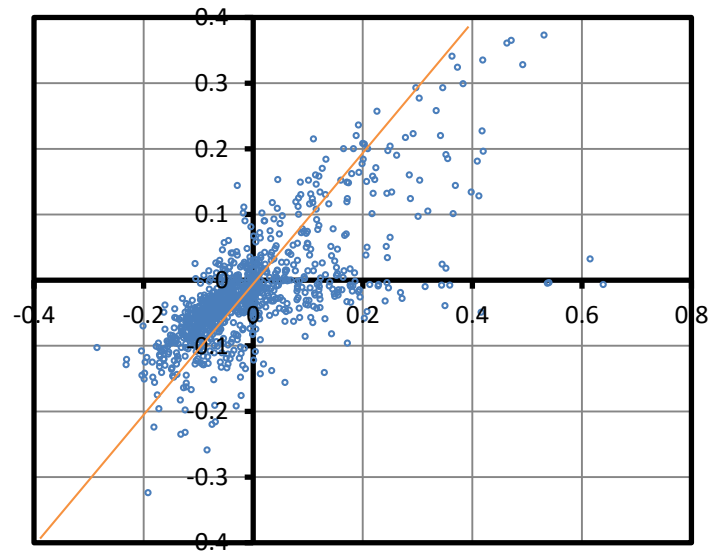

(b) Model 1: MLC-PC80 vs MLC-SSBw (typed)

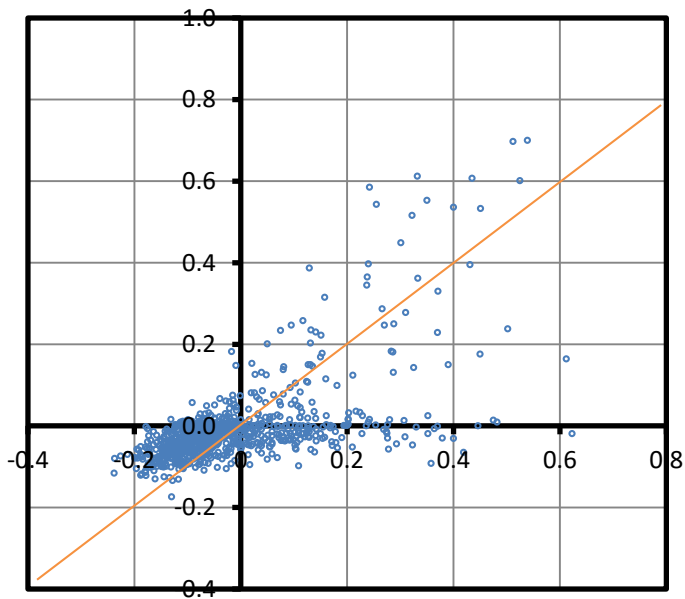

Model 1: MLC-PC80 vs MLC-SSBw (untyped)

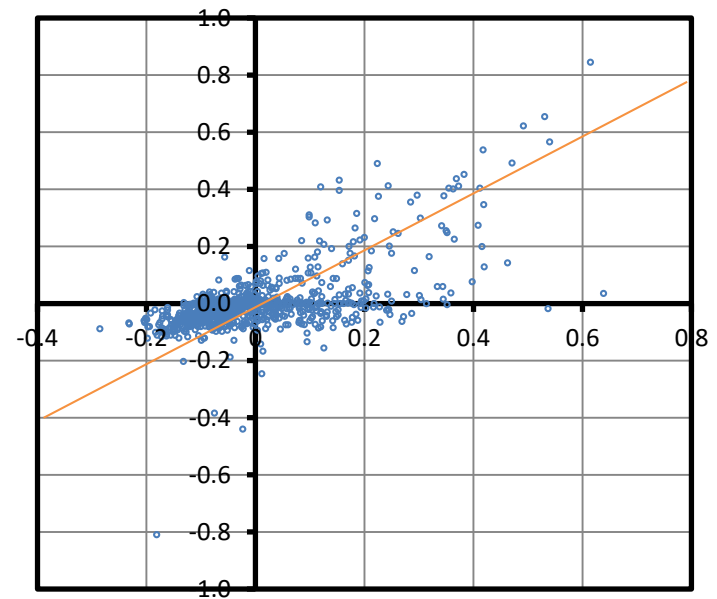

(a) **Model 2: MLC-minP vs MLC-SSBw (typed)**

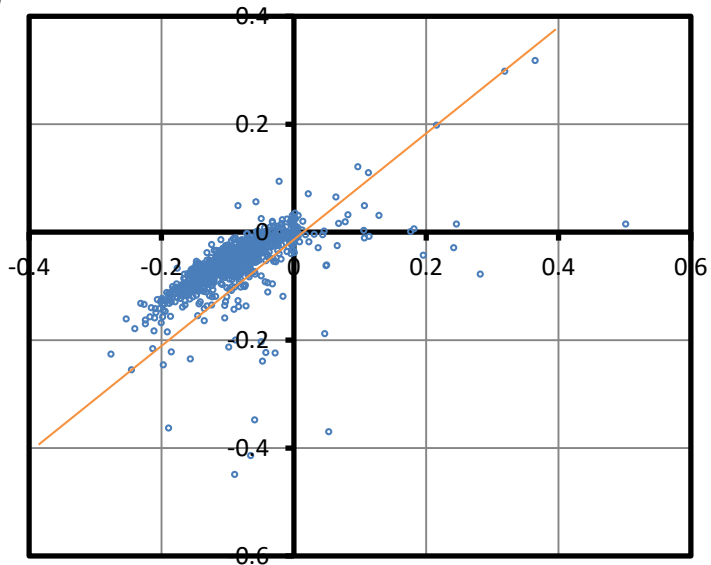

**Model 2: MLC-minP vs MLC-SSBw (untyped)**

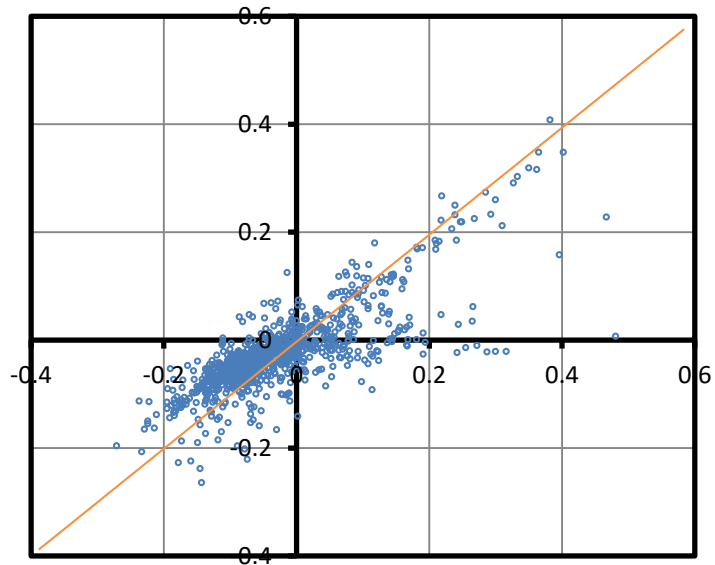

(b) **Model 2: MLC-PC80 vs MLC-SSBw (typed)**

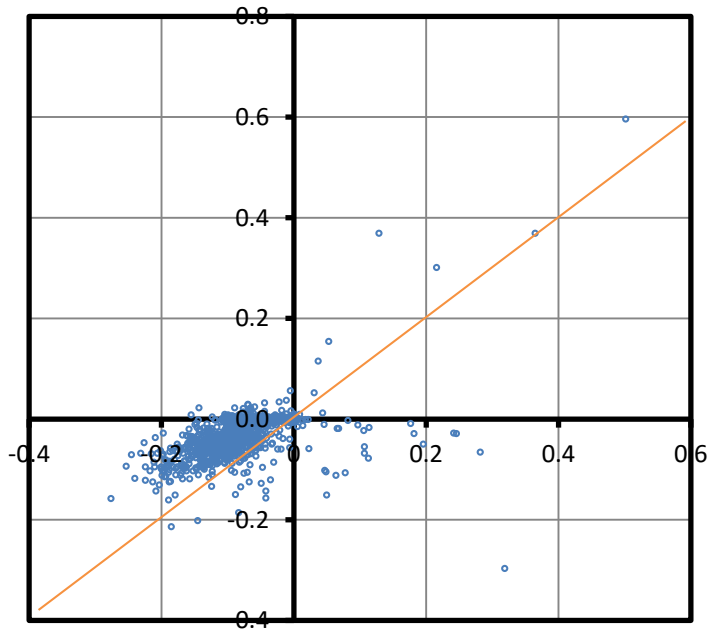

**Model 2: MLC-PC80 vs MLC-SSBw (untyped)**

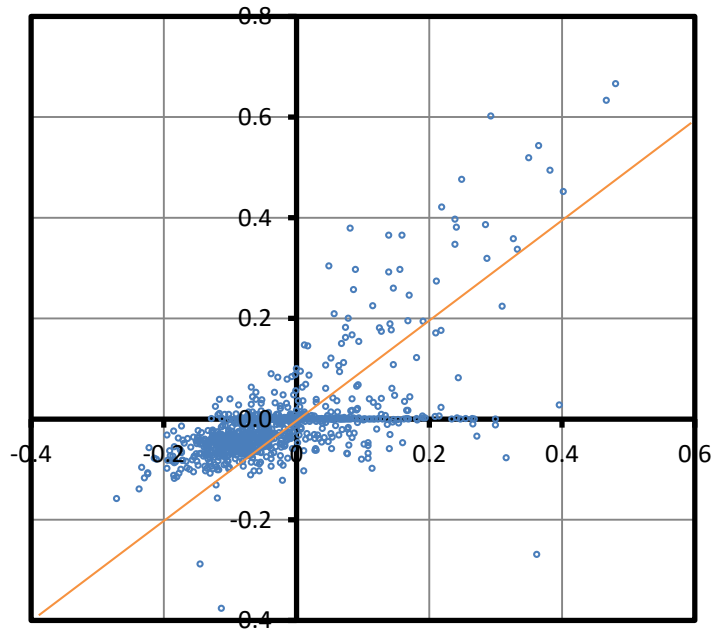

(a) Model 3: MLC-minP vs MLC-SSBw (typed)

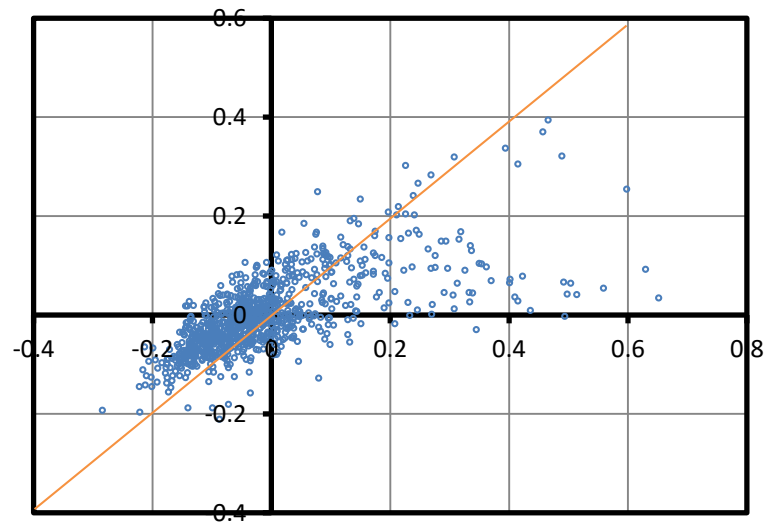

Model 3: MLC-minP vs MLC-SSBw (untyped)

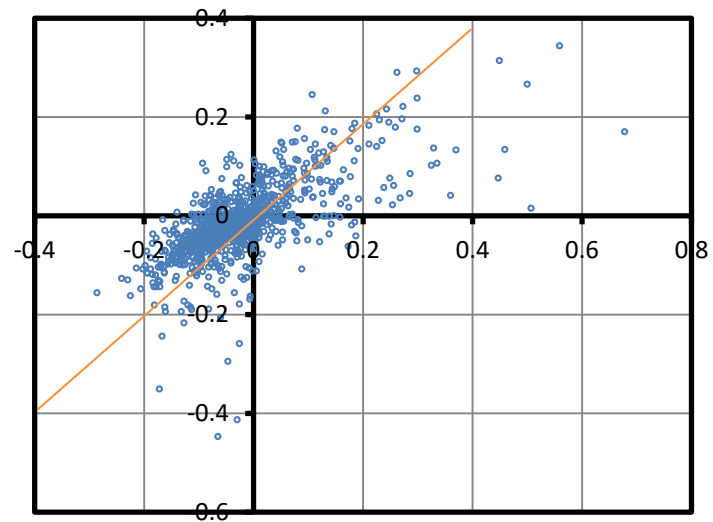

(b) Model 3: MLC-PC80 vs MLC-SSBw (typed)

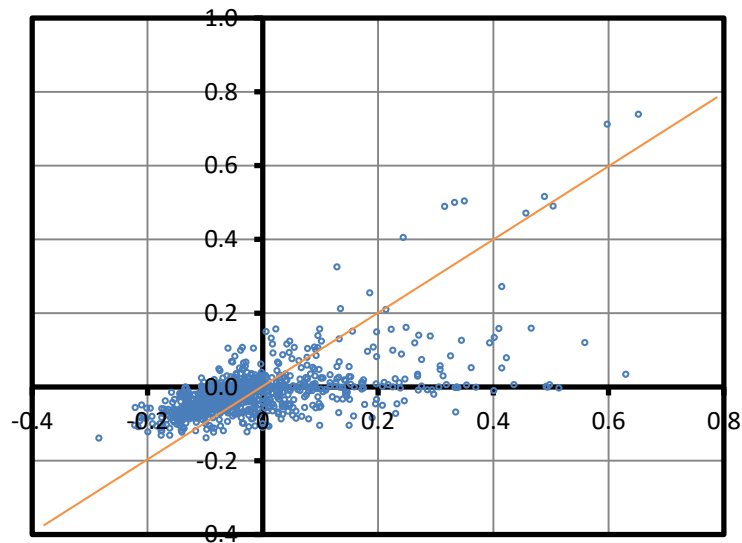

Model 3: MLC-PC80 vs MLC-SSBw (untyped)

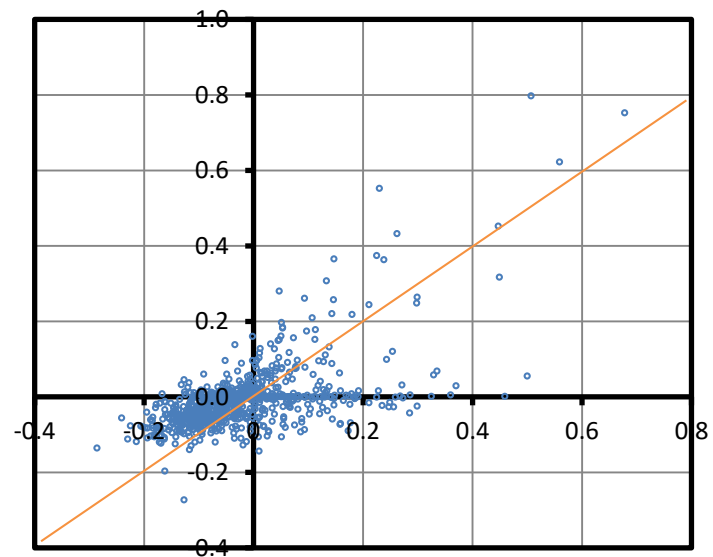

(a) Model 4: MLC-minP vs SSBw (typed)

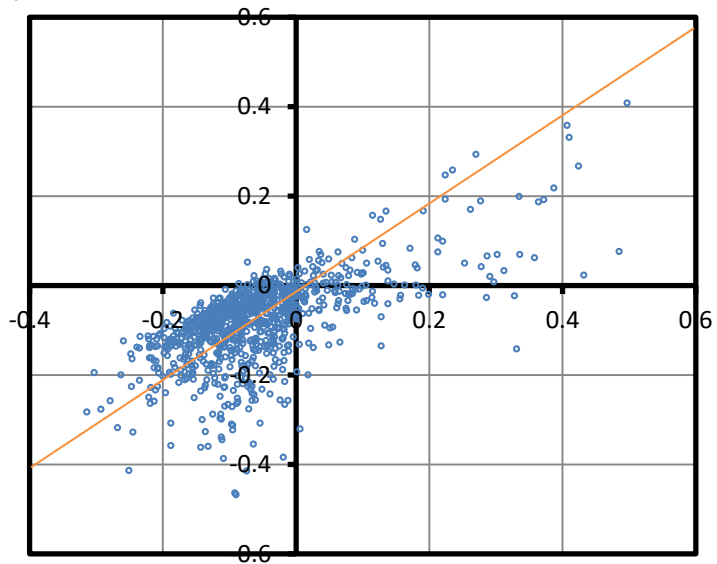

Model 4: MLC-minP vs SSBw (untyped)

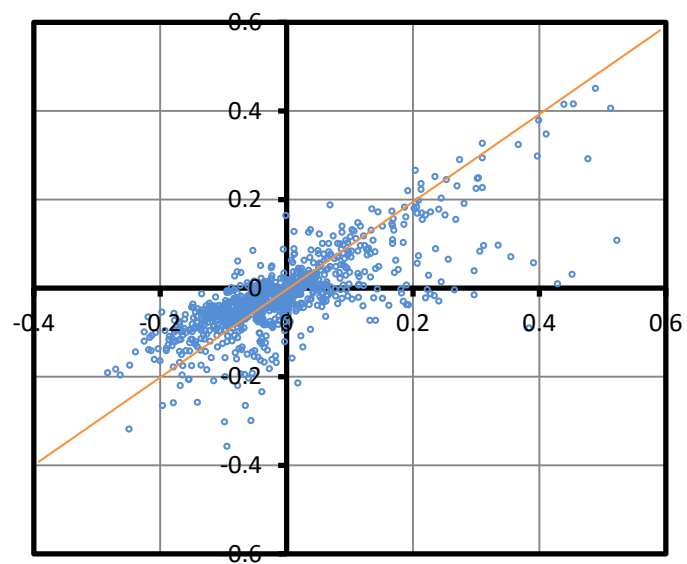

(b) Model 4: MLC-PC80 vs MLC-SSBw (typed)

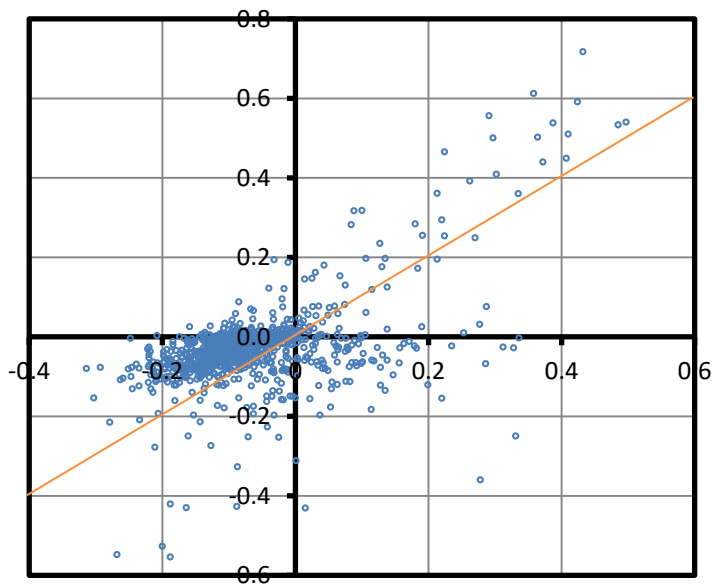

Model 4: MLC-PC80 vs MLC-SSBw (untyped)

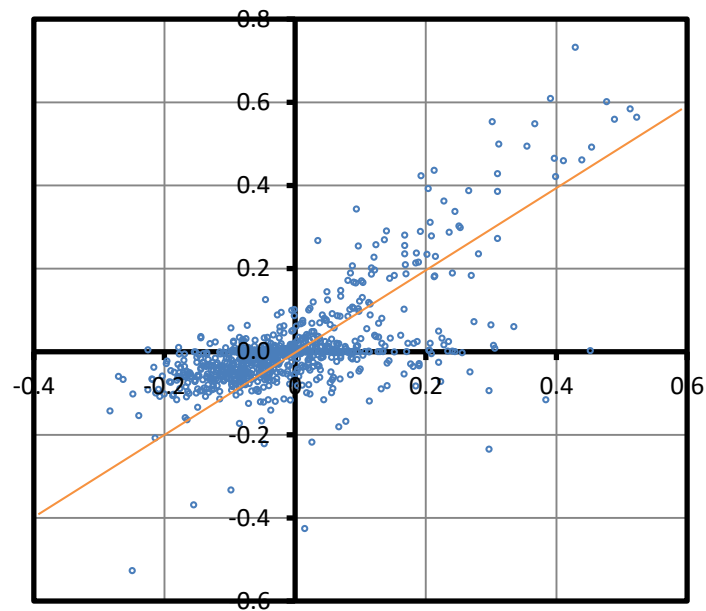

(a) Model 5: MLC-minP vs MLC-SSBw (typed)

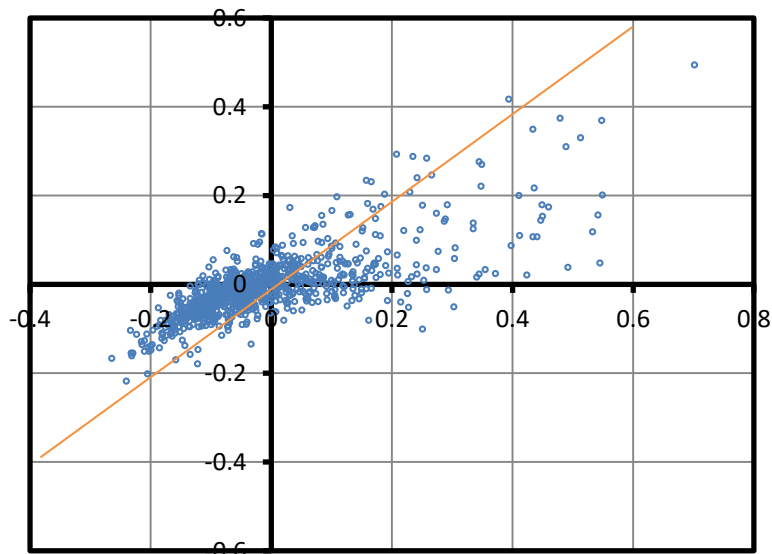

Model 5: MLC-minP vs SSBw (untyped)

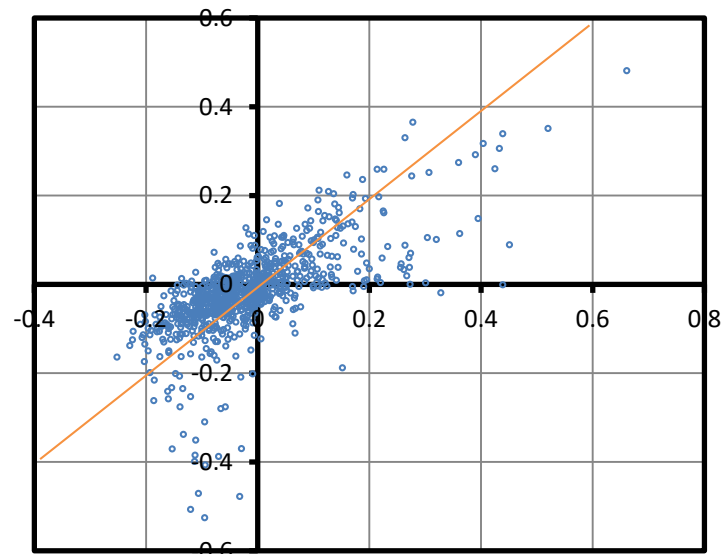

(b) Model 5: MLC-PC80 vs MLC-SSBw (typed)

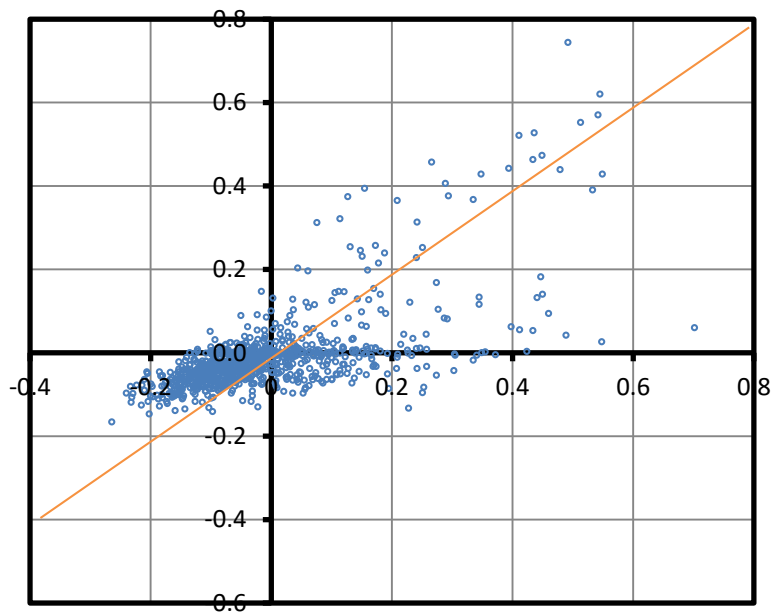

Model 5: MLC-PC80 vs MLC-SSBw (untyped)

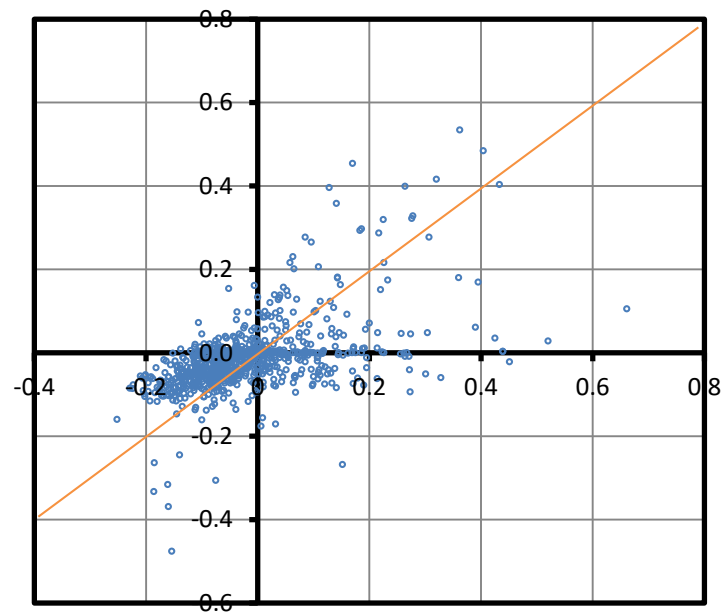

Figure S5. Power differentials (a) between MLC and MinP-M, and (b) between MLC and SKAT, each plotted against power differentials between MLC and SKATO. The latter is on the x axis. Each point corresponds to one gene with power estimated in 1000 replicated datasets (nominal alpha=0.05). Data were generated under simulation models 1-5, as defined in Table 2, and were analysed with (typed) and without (untyped) the causal variant(s) in the regression model.

In the upper panels: MLC power is greater than MinP-M power for genes above the x axis, MLC power is greater than SKATO power for genes on the right of the y axis, and the upper right quadrant includes all genes for which MLC is more powerful than both MinP-M and SKATO. Genes close to the diagonal line have MinP-M power  $\approx$  SKATO power, while those below the line have MinP-M power  $>$  SKATO power.

In the lower panels: MLC power is greater than SKAT power for genes above the x axis, MLC power is greater than SKATO power for genes on the right of the y axis, and the upper right quadrant includes all genes for which MLC is more powerful than both SKAT and SKATO). Genes close to the diagonal line have SKAT power  $\approx$  SKATO power, while those below the line have SKAT power  $>$  SKATO power..

The table summarizes the number of genes according to power inequalities among the methods.

| Model | # of genes | Analysis | Power Differential |           |          |               |           |
|-------|------------|----------|--------------------|-----------|----------|---------------|-----------|
|       |            |          | MLC>MinPM          | MLC>SKATO | MLC>SKAT | MLC>Min,SKATO | MLC>all 3 |
| 1     | 1000       | Typed    | 80                 | 380       | 296      | 62            | 53        |
|       |            | Untyped  | 258                | 438       | 390      | 195           | 173       |
| 2     | 993        | Typed    | 62                 | 106       | 67       | 37            | 25        |
|       |            | Untyped  | 223                | 371       | 314      | 142           | 125       |
| 3     | 935        | Typed    | 372                | 284       | 326      | 193           | 178       |
|       |            | Untyped  | 312                | 370       | 317      | 198           | 165       |
| 4     | 993        | Typed    | 119                | 238       | 179      | 98            | 88        |
|       |            | Untyped  | 286                | 452       | 395      | 221           | 203       |
| 5     | 935        | Typed    | 359                | 458       | 334      | 294           | 238       |
|       |            | Untyped  | 313                | 416       | 351      | 230           | 202       |

(a) Model 1: MLC-minP vs MLC-SKATO (typed)

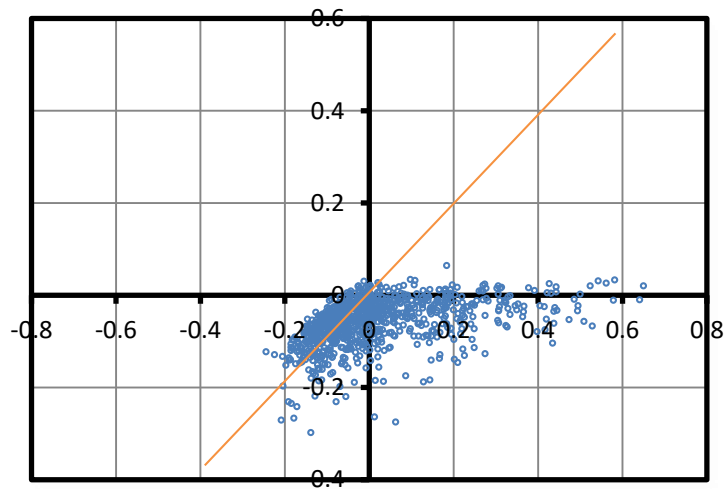

Model 1: MLC-minP vs MLC-SKATO (untyped)

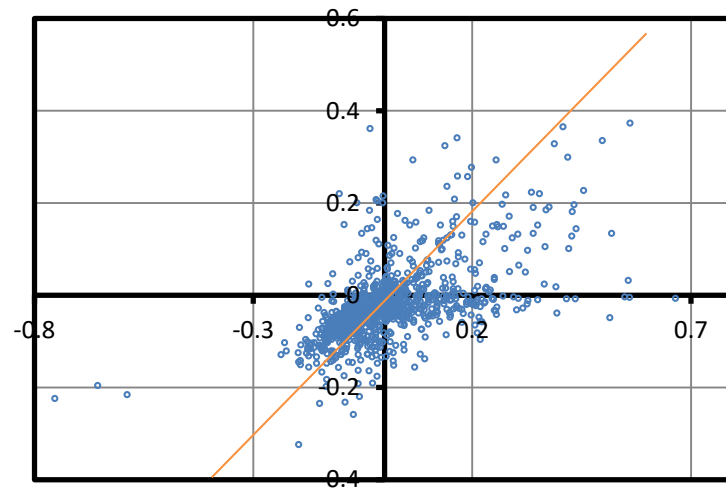

(b) Model 1: MLC-SKAT vs MLC-SKATO (typed)

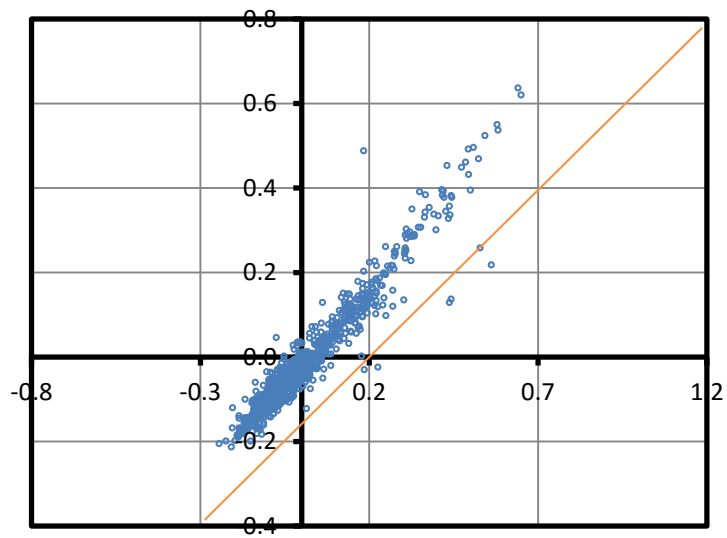

Model 1: MLC-SKAT vs MLC-SKATO (untyped)

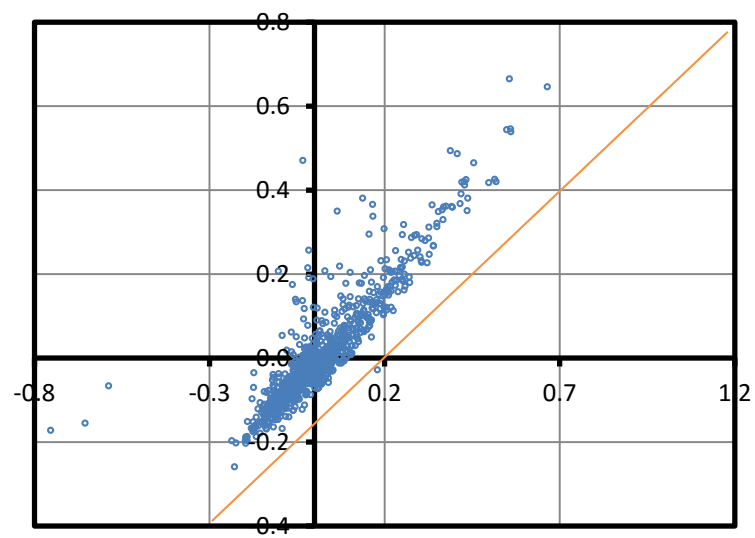



(a) Model 2: MLC-minP vs MLC-SKATO (typed)

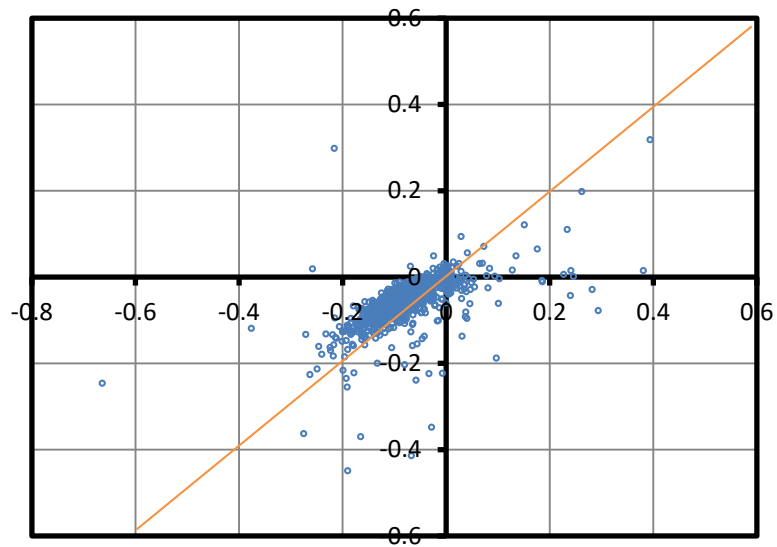

Model 2: MLC-minP vs MLC-SKATO (untyped)

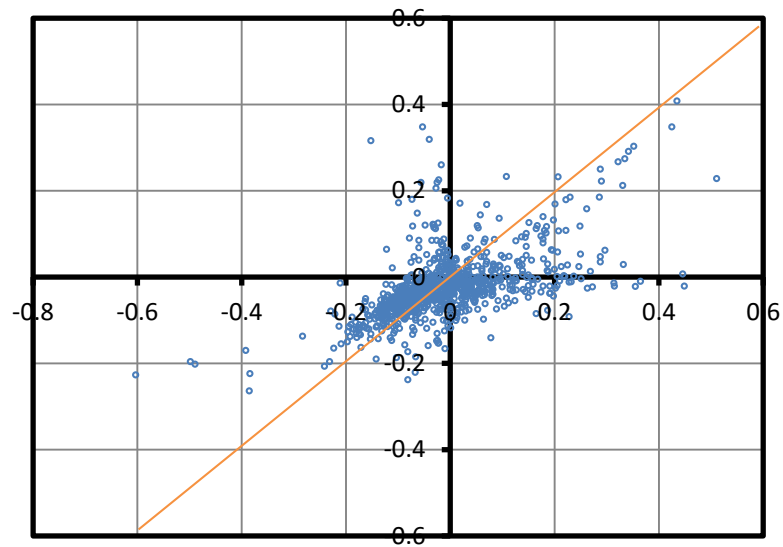

(b) Model 2: MLC-SKAT vs MLC-SKATO (typed)

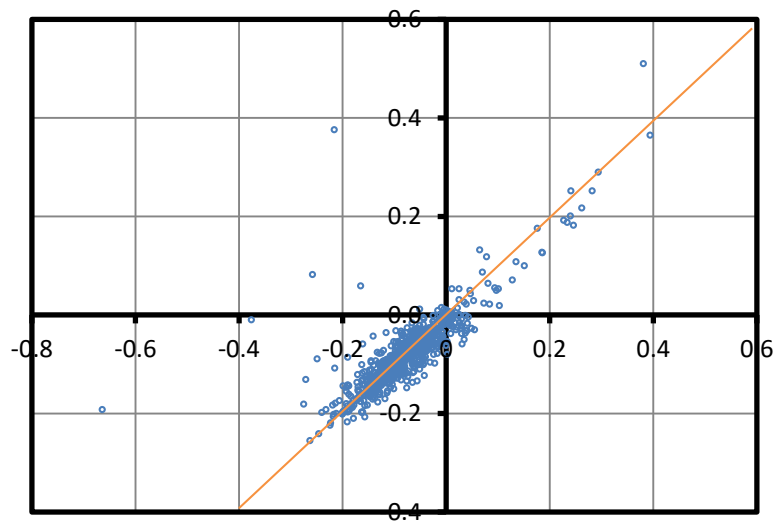

Model 2: MLC-SKAT vs MLC-SKATO (untyped)

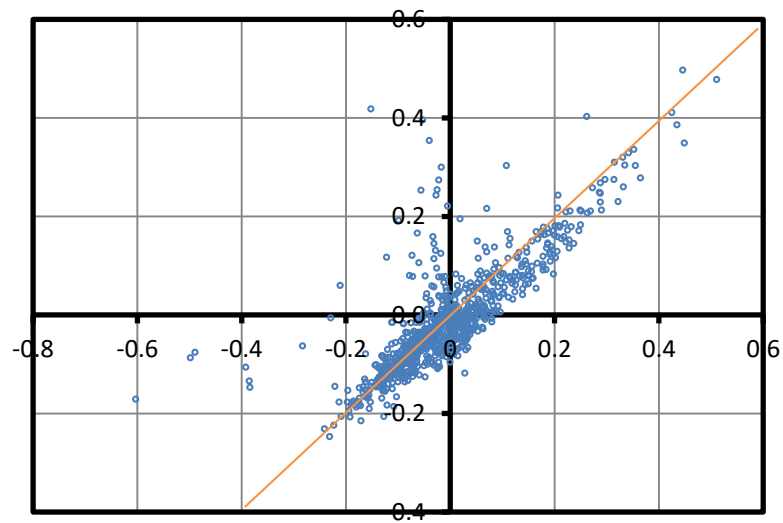

**Model 3: MLC-minP vs MLC-SKATO (typed)**

(a)

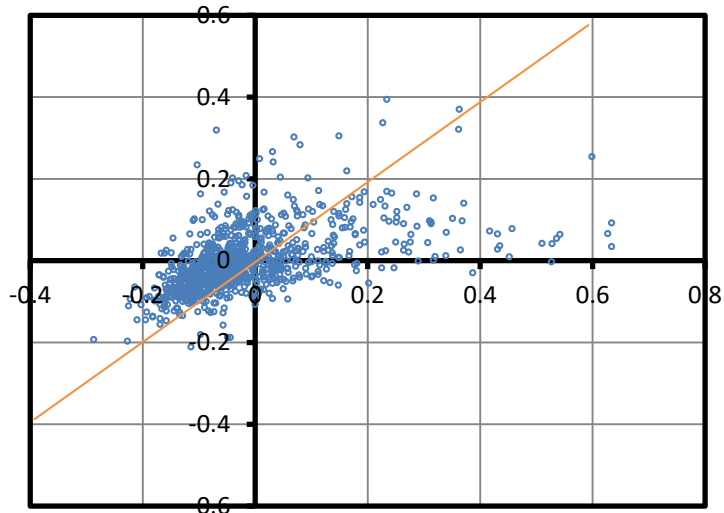

**Model 3: MLC-minP vs MLC-SKATO (untyped)**

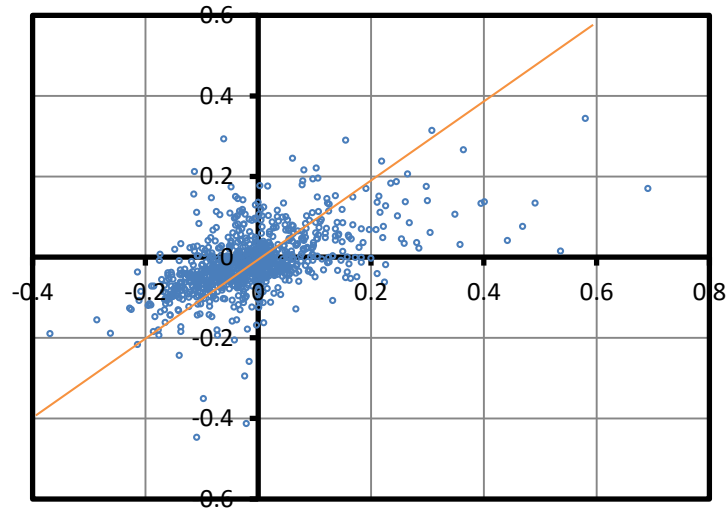

**Model 3: MLC-SKAT vs MLC-SKATO (typed)**

(b)

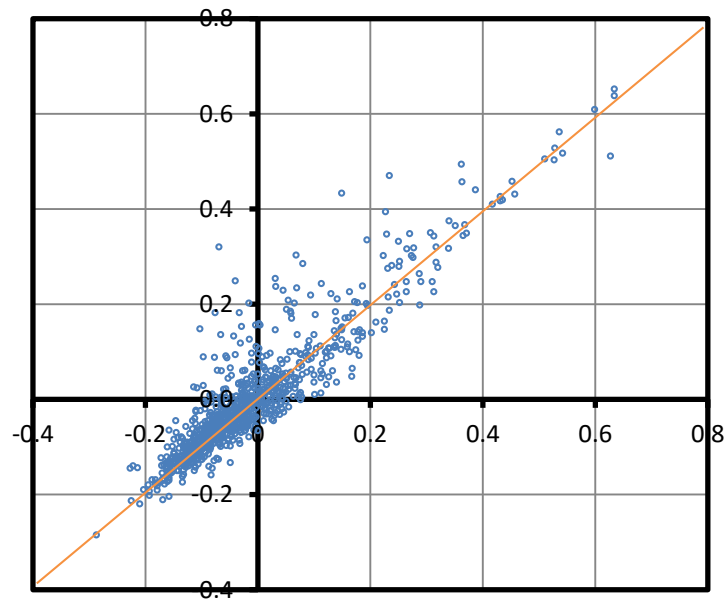

**Model 3: MLC-SKAT vs MLC-SKATO (untyped)**

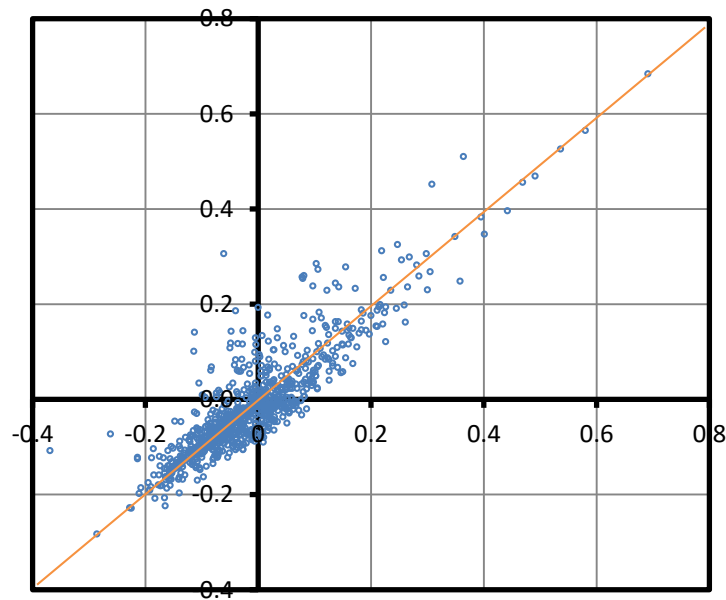

(a) Model 4: MLC-minP vs MLC-SKATO (typed)

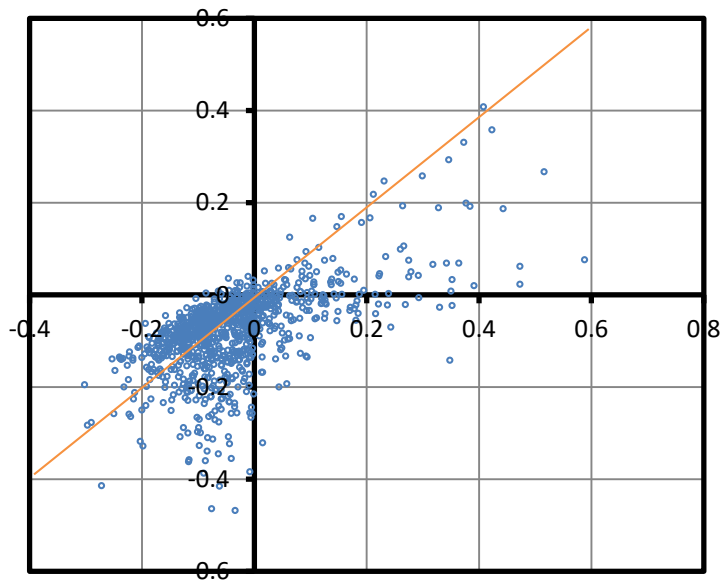

Model 4: MLC-minP vs MLC-SKATO (untyped)

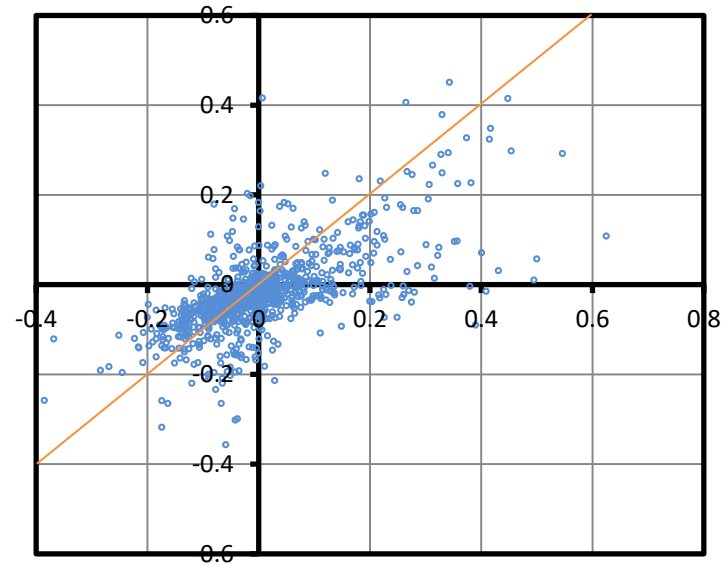

(b) Model 4: MLC-SKAT vs MLC-SKATO (typed)

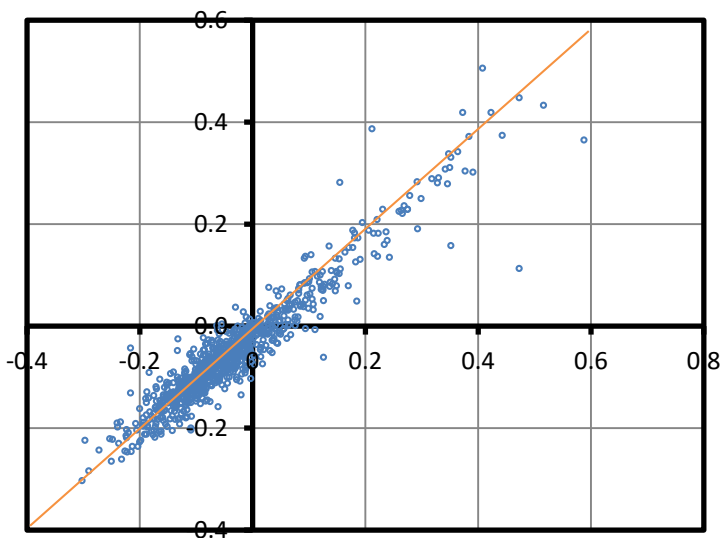

Model 4: MLC-SKAT vs MLC-SKATO (untyped)

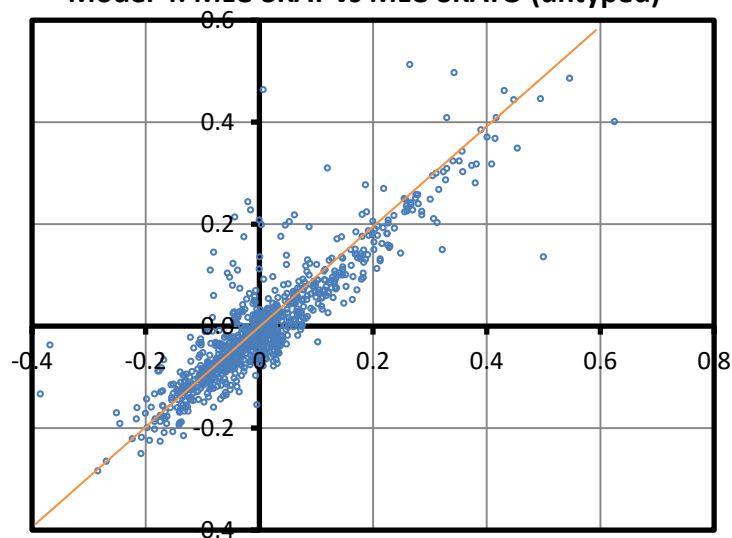

(a) Model 5: MLC-minP vs MLC-SKATO (typed)

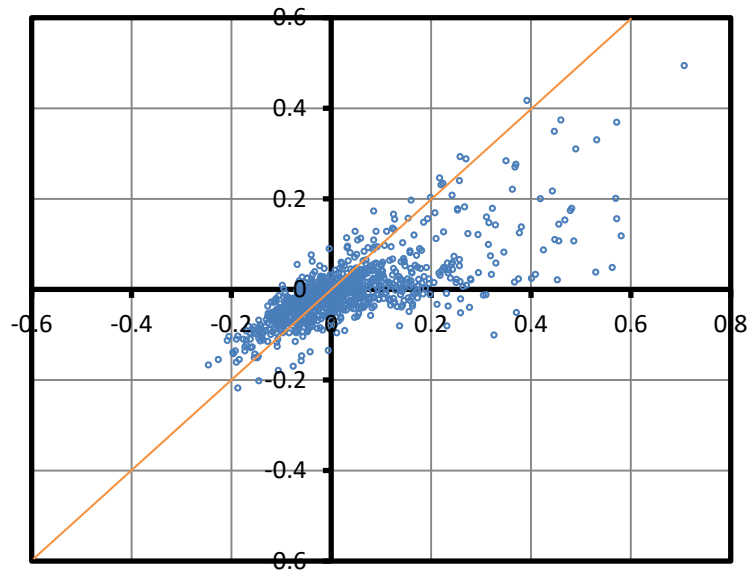

Model 5: MLC-minP vs SKATO (untyped)

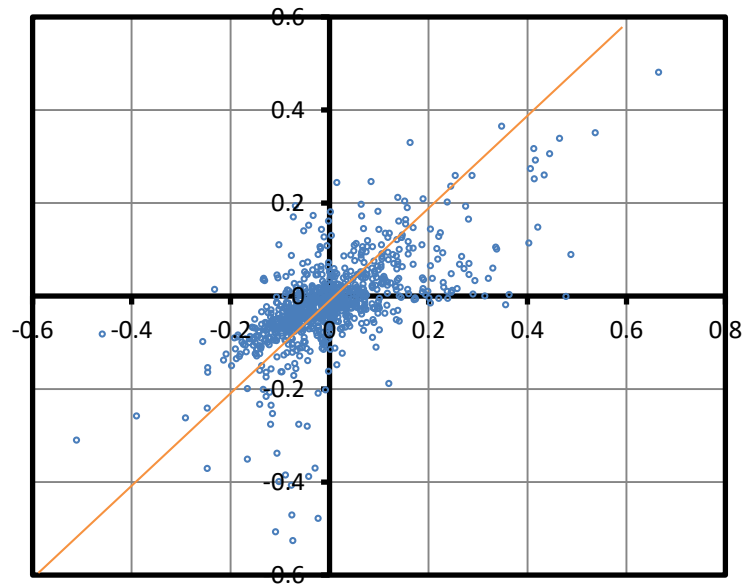

(b) Model 5: MLC-SKAT vs MLC-SKATO (typed)

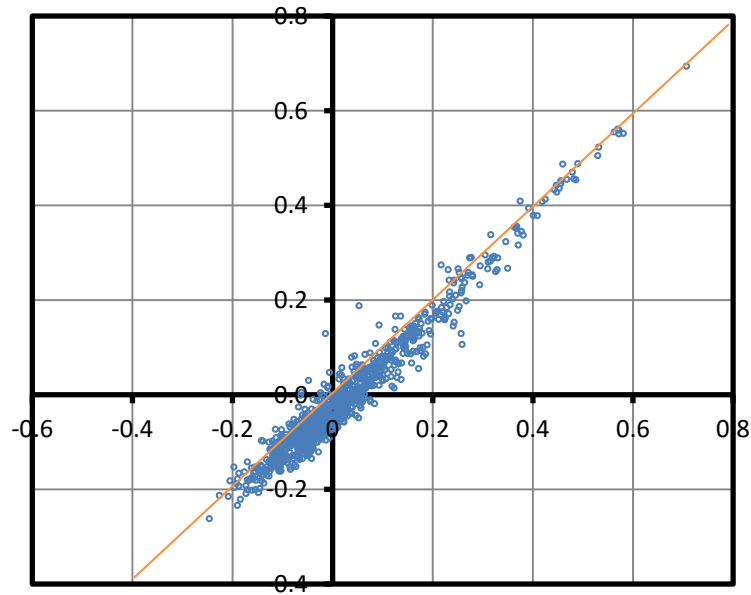

Model 5: MLC-SKAT vs MLC-SKATO (untyped)

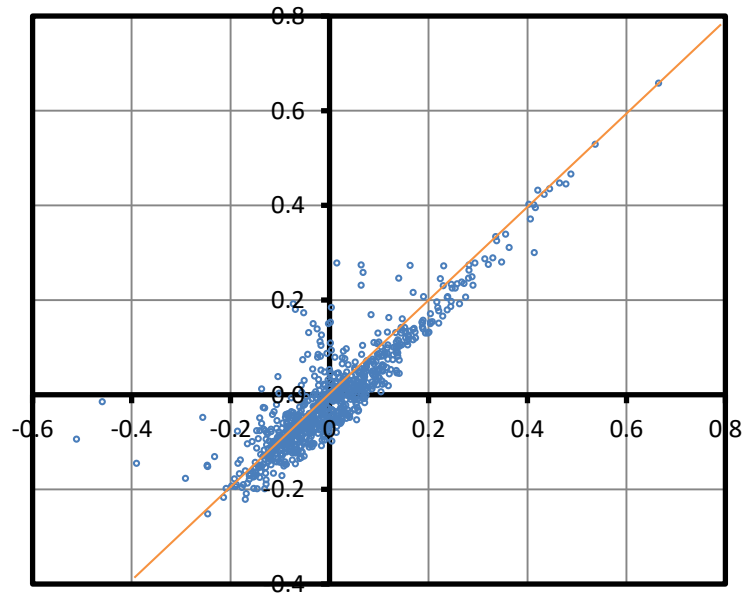

Figure S6. Power differentials (a) between MLC and MinP-M, and (b) between MLC and Wald, each plotted against power differentials between MLC and LC. The latter is on the x axis. Each point corresponds to one gene with power estimated in 1000 replicated datasets (nominal  $\alpha=0.05$ ). Data were generated under simulation models 1-5, as defined in Table 2, and were analysed with (typed) and without (untyped) the causal variant(s) in the regression model.

In the upper panels: MLC power is greater than MinP-M power for genes above the x axis, MLC power is greater than LC power for genes on the right of the y axis, and the upper right quadrant includes all genes for which MLC is more powerful than both MinP-M and LC. Genes close to the diagonal line have MinP-M power  $\approx$  LC power, while those below the line have MinP-M power  $>$  LC power.

In the lower panels: MLC power is greater than Wald power for genes above the x axis, MLC power is greater than LC power for genes on the right of the y axis, and the upper right quadrant includes all genes for which MLC is more powerful than both Wald and LC). Genes close to the diagonal line have Wald power  $\approx$  LC power, while those below the line have Wald power  $>$  LC power.

The table summarizes the number of genes according to power inequalities among the methods.

| Model | # of genes | Analysis | Power Differential |        |          |            |           |
|-------|------------|----------|--------------------|--------|----------|------------|-----------|
|       |            |          | MLC>MinPM          | MLC>LC | MLC>Wald | MLC>Min,LC | MLC>all 3 |
| 1     | 1000       | Typed    | 80                 | 502    | 964      | 60         | 60        |
|       |            | Untyped  | 258                | 489    | 866      | 199        | 171       |
| 2     | 993        | Typed    | 62                 | 267    | 947      | 31         | 29        |
|       |            | Untyped  | 223                | 397    | 792      | 146        | 107       |
| 3     | 935        | Typed    | 372                | 510    | 893      | 298        | 283       |
|       |            | Untyped  | 312                | 388    | 764      | 221        | 182       |
| 4     | 993        | Typed    | 119                | 427    | 516      | 100        | 64        |
|       |            | Untyped  | 286                | 490    | 603      | 218        | 141       |
| 5     | 935        | Typed    | 359                | 585    | 905      | 319        | 310       |
|       |            | Untyped  | 313                | 498    | 741      | 264        | 218       |

(a)

Model 1: MLC-minP vs MLC-LC (typed)

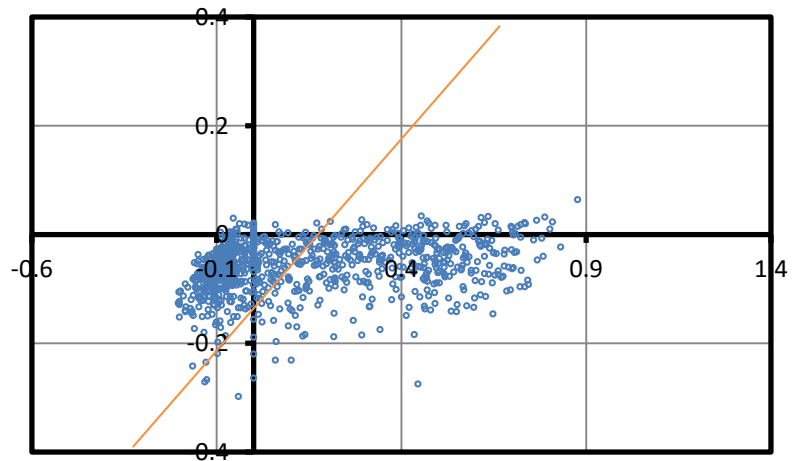

Model 1: MLC-minP vs MLC-LC (untyped)

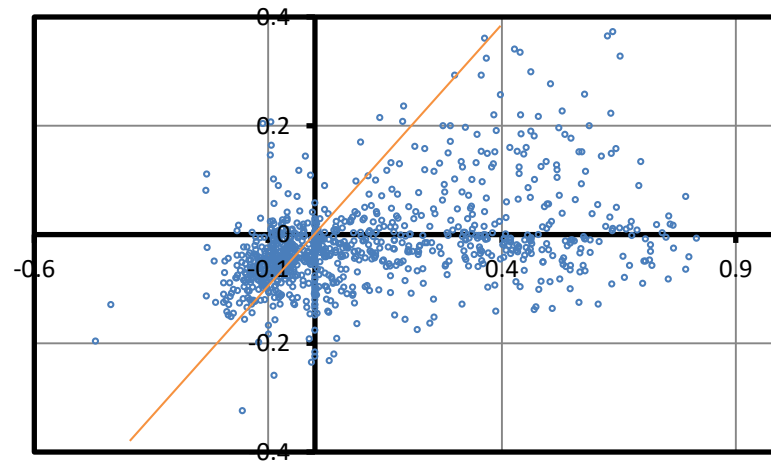

(b)

Model 1: MLC-Wald vs MLC-LC (typed)

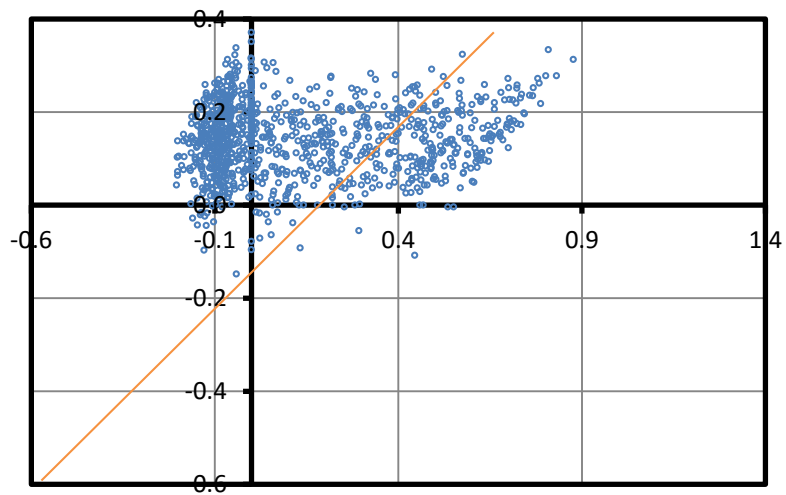

Model 1: MLC-Wald vs MLC-LC (untyped)

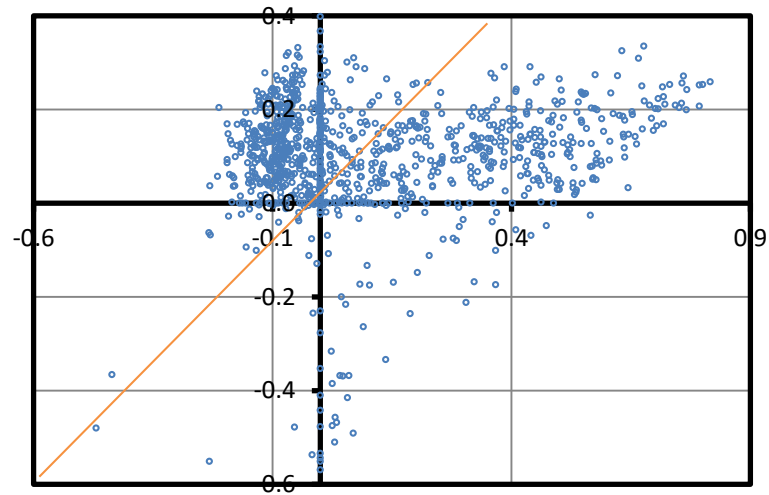

(a) Model 2: MLC-minP vs MLC-LC (typed)

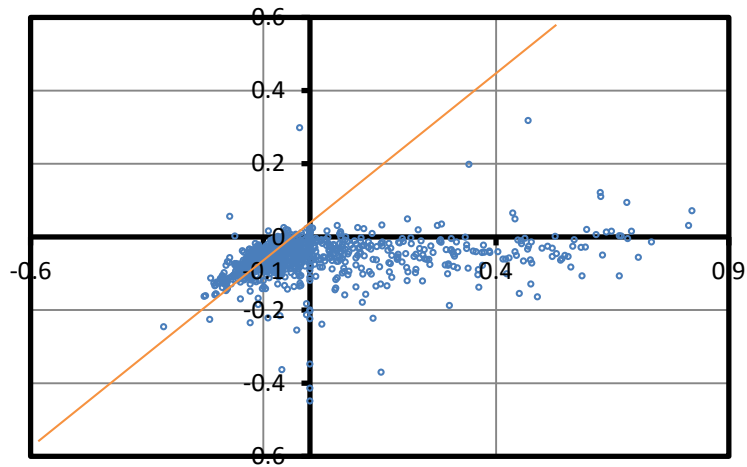

Model 2: MLC-minP vs MLC-LC (untyped)

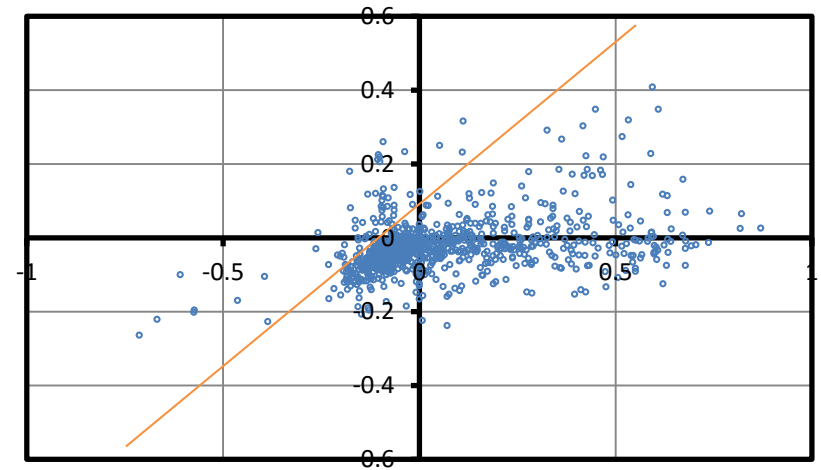

(b) Model 2: MLC-Wald vs MLC-LC (typed)

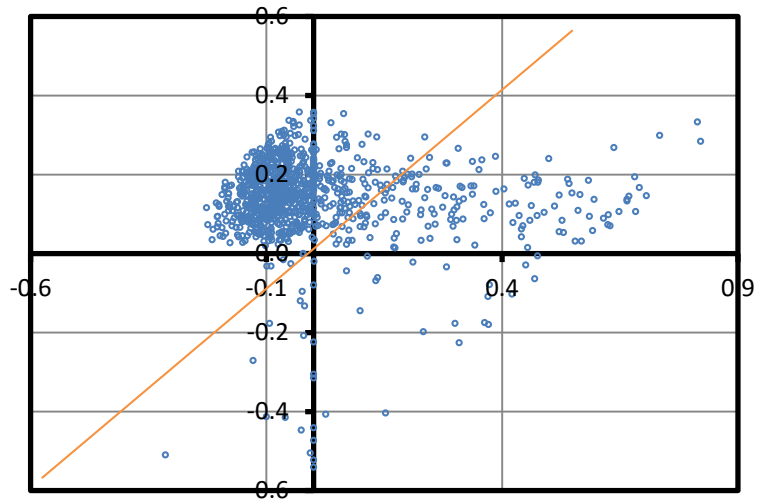

Model 2: MLC-Wald vs MLC-LC (untyped)

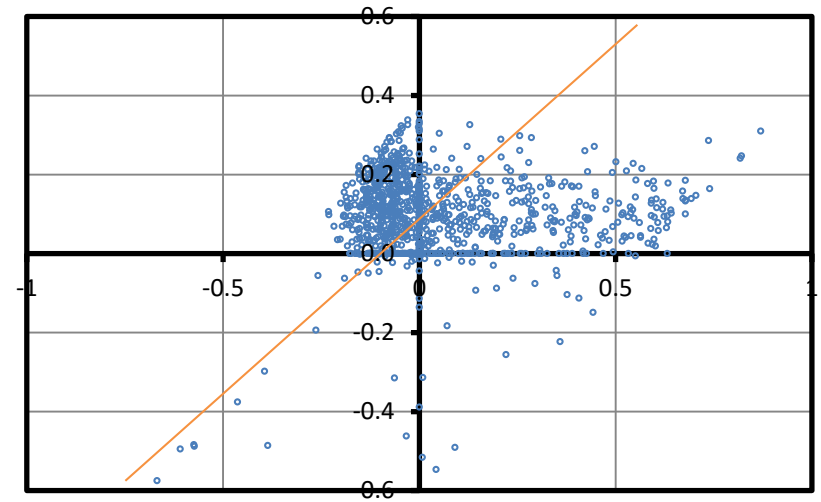

(a) Model 3: MLC-minP vs MLC-LC (typed)

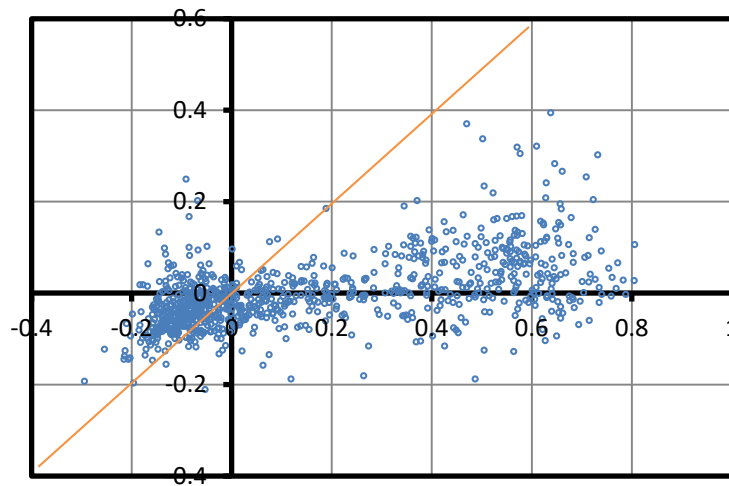

Model 3: MLC-minP vs MLC-LC (untyped)

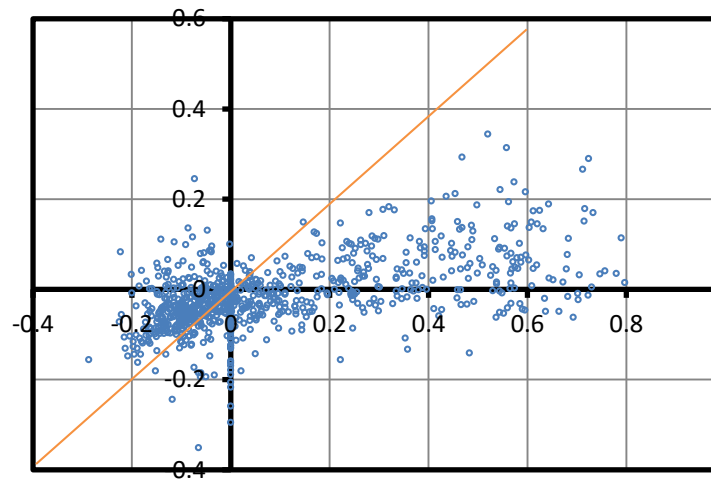

(b) Model 3: MLC-Wald vs MLC-LC (typed)

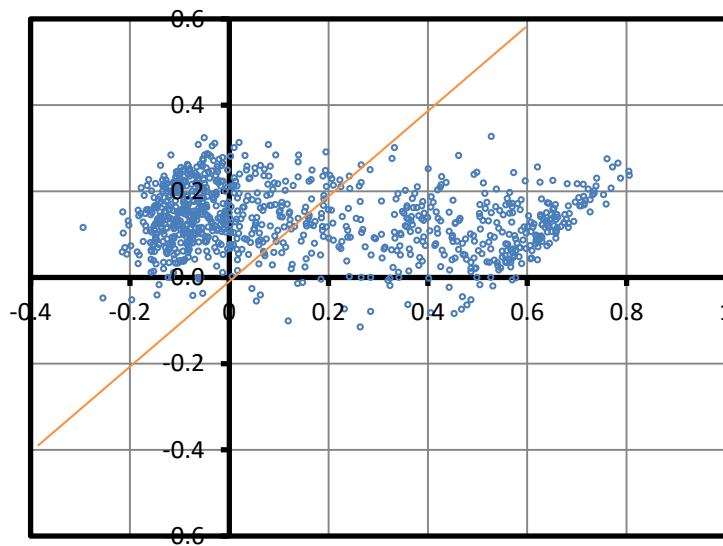

Model 3: MLC-Wald vs MLC-LC (untyped)

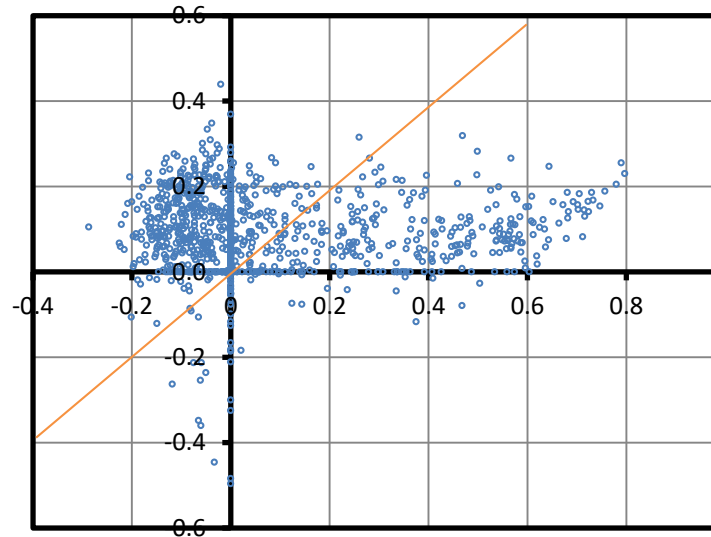



(a) Model 4: MLC-minP vs MLC-LC (typed)

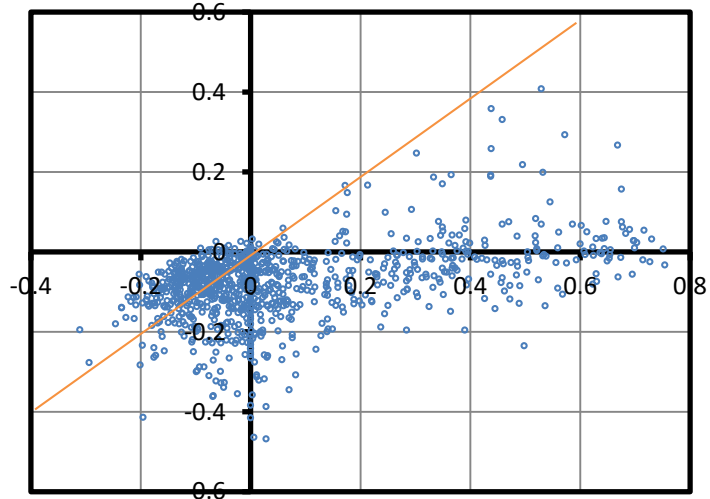

Model 4: MLC-minP vs MLC-LC (untyped)

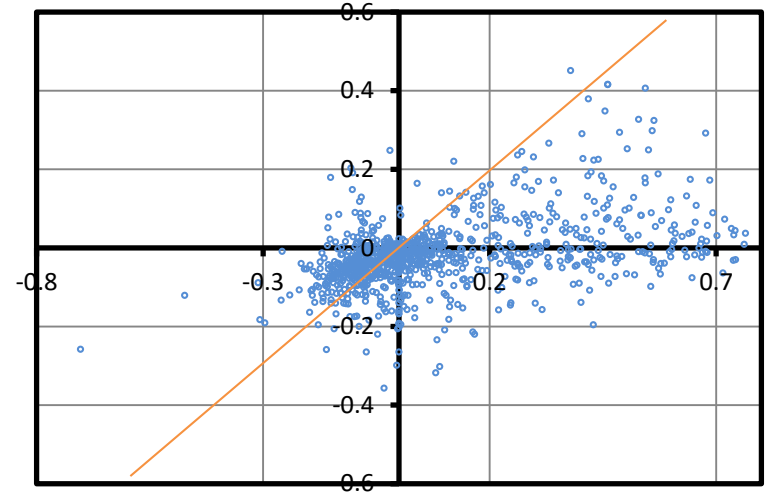

(b) Model 4: MLC-Wald vs MLC-LC (typed)

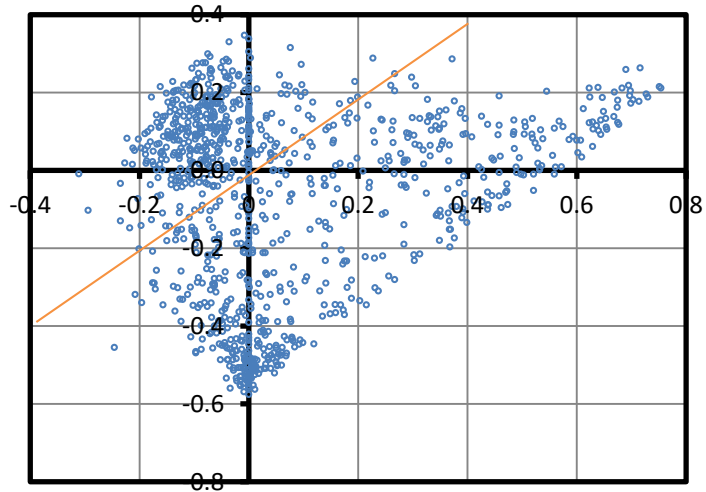

Model 4: MLC-Wald vs MLC-LC (untyped)

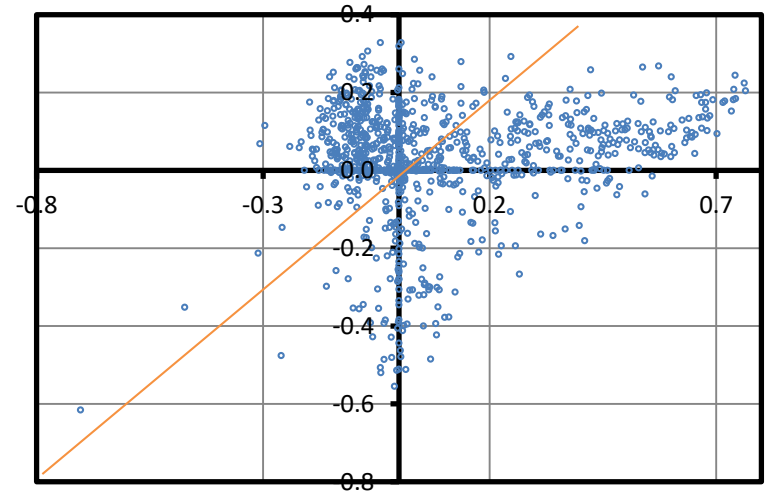

(a) Model 5: MLC-minP vs MLC-LC (typed)

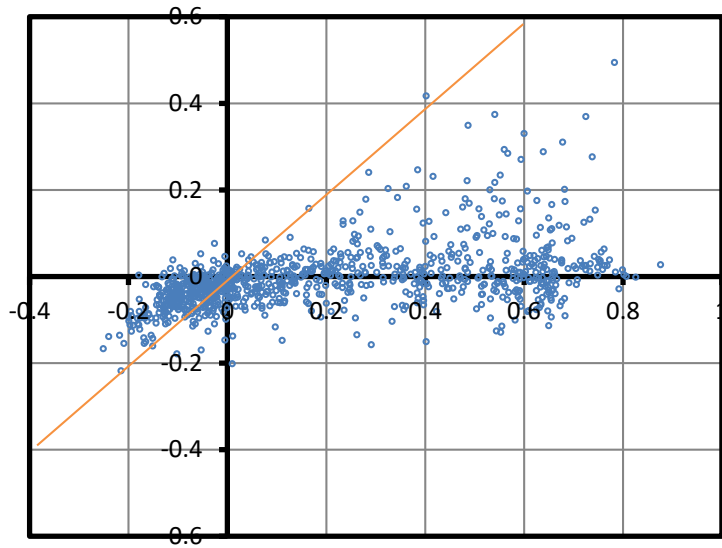

Model 5: MLC-minP vs LC (untyped)

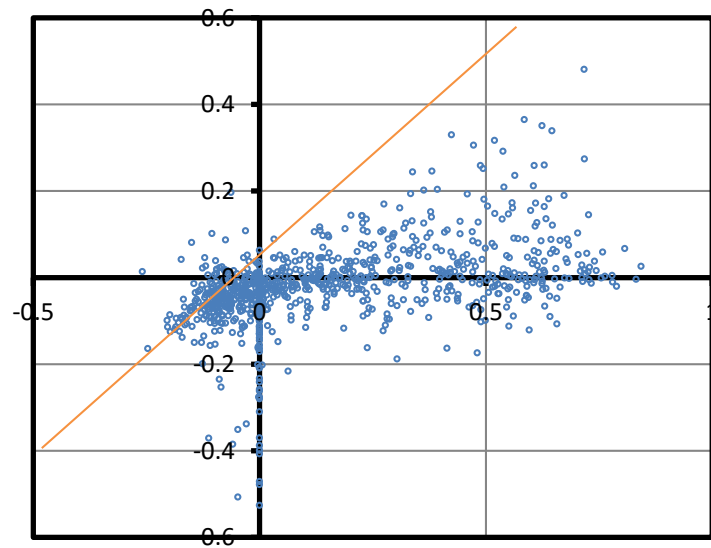

(b) Model 5: MLC-Wald vs MLC-LC (typed)

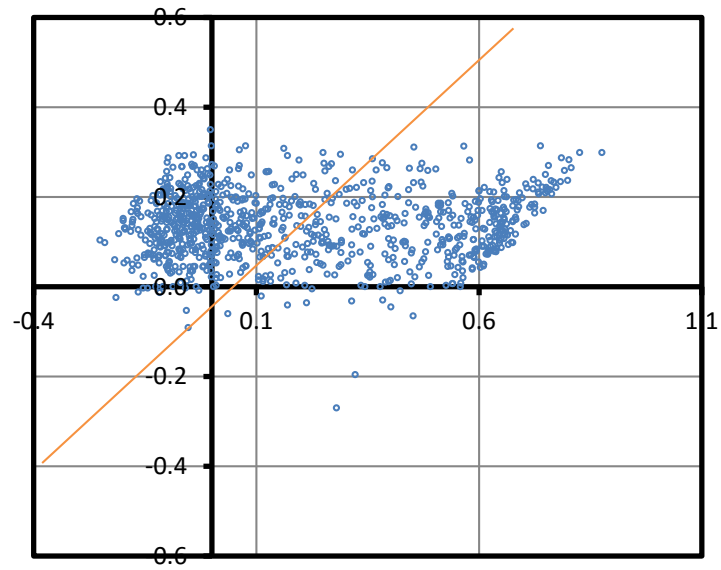

Model 5: MLC-Wald vs MLC-LC (untyped)

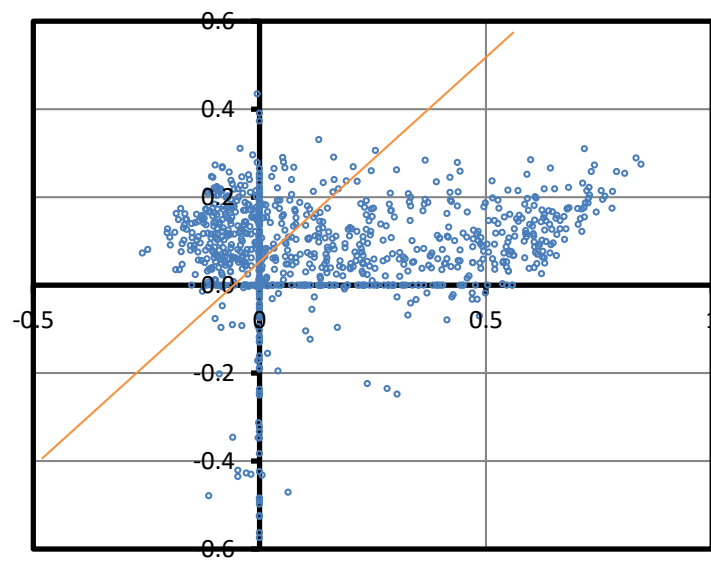

Supplement: GEPI-41-108-s002.pdf [file GEPI-41-108-s002.pdf]
